# Supplementary material
Source: publisher site journal article supplement (https://www.dovepress.com/article/598023)
Supplement: Supplementary file 1 [file 598023%20Revised%20supplementary%20material.docx]

**supplementary material:**

**S1:**

**EBSCOhost (AMED, CINAHL):**

- **key words group 1:** alpha-1 antitrypsin deficiency OR AATD OR A1AD
- **key words group 2:** copd or chronic obstructive pulmonary disease or chronic obstructive airway disease or chronic obstructive lung disease
- **key words group 3:** Gas transfer OR diffusion capacity OR dlco OR TLCO OR KCO
- **key words group 4:** (spirometry test or pulmonary functions test ) OR fev1
- **key words group 5:** S1 AND S2 AND S3 AND S4

**Web of Science:**

- **key words group 1:** #1 TS=(AATD OR "alpha-1 antitrypsin deficiency")
- **key words group 2:** #2 TS=(COPD OR "chronic obstructive pulmonary disease")
- **key words group 3:** #3 TS=("diffusion capacity" OR DLCO OR TLCO OR KCO)
- **key words group 4:** #4 TS=(FEV1 OR "forced expiratory volume" OR spirometry OR "lung function")
- **key words group 5:** #5 #1 AND #2 AND #3 AND #4

**Ovid (EMBASE, Medline):**

- **key words group 1:** exp alpha 1 antitrypsin deficiency/
- **key words group 2:** exp chronic obstructive lung disease/
- **key words group 3:** exp gas diffusion/
- **key words group 4:** exp lung function/
- **key words group 5:** exp spirometry/
- **key words group 6:** exp forced expiratory volume/
- **key words group 7:** Transfer Coefficient for Carbon Monoxide.mp.
- **key words group 8:** Transfer Factor for Carbon Monoxide.mp.
- **key words group 9:** exp diffusing capacity for carbon monoxide/
- **key words group 10:** 1 and 2
- **key words group 11:** 3 or 4 or 5 or 6 or 7 or 8 or 9
- **key words group 12:** 10 and 11

**Scopus:**

- **key words group 1:** ( TITLE-ABS-KEY ( alpha 1 antitrypsin AND deficiency )
- **key words group 2:** ( TITLE-ABS-KEY ( copd OR chronic AND obstructive AND pulmonary AND disease) )
- **key words group 3:** (TITLE-ABS-KEY (diffusion AND capacity OR gas AND transfer OR dlco OR tlco OR kco) )
- **key words group 4:** (TITLE-ABS-KEY (lung AND function OR spirometry OR fev1 OR forced AND expiratory AND volume ) )
- **key words group 5:** 1 AND 2 AND 3 AND 4

**ProQuest:**

- **key words group 1:** noft(alpha-1 antitrypsin deficiency) OR noft(AATD) OR A1AD
- **key words group 2:** (chronic obstructive pulmonary diseases) OR COPD
- **key words group 3:** (gas transfer) OR (diffusion capacity) OR DLCO OR TLCO OR KCO
- **key words group 4:** (lung function) OR (spirometry test) OR fev1
- **key words group 5:** [S1] AND [S2] AND [S3] AND [S4]
